# Supplementary material for: Synthesis of cytotoxic ferrocenyl flavones via a ferricenium-mediated 1,6-oxidative cyclization
Source: Royal Society of Chemistry journal article supplement (doi:10.1039/c0cc01290d), 2010-01-01
Supplement: c0cc01290d.pdf [file c0cc01290d.pdf]

## Supporting information

### Synthesis of Cytotoxic Ferrocenyl Flavones via a Ferricenium-Mediated 1,6-Oxidative Cyclization

Jean-Philippe Monserrat, Guy G. Chabot, Louis Hamon, Lionel Quentin, Daniel Scherman, Gérard Jaouen and Elizabeth A. Hillard

#### General remarks

All aldolic condensation reactions were carried out under argon, using standard Schlenk techniques. Cyclization reactions were done in air. THF was distilled over sodium-benzophenone. All other chemical reagents and solvents were used without further purification. Preparative HPLC was performed using a Shimadzu LC-8A machine. Silica gel chromatography was done with Merck 60 (40-63  $\mu\text{m}$ ) silica.  $^1\text{H}$  and  $^{13}\text{C}$  NMR spectra were measured with a 300 or 400 MHz Bruker Advance spectrometer, and  $\delta$  are given in ppm. LR-MS mass spectra were measured on a ThermoScientific ITQ1100 spectrometer using the direct exposure probe method by the mass spectrometry service at the Ecole Nationale Supérieure de Chimie de Paris.

#### General preparation of ferrocenyl chalcones

Ferrocenyl chalcones were prepared following the literature procedure.<sup>1</sup> Ferrocene carboxaldehyde (1 equiv, (50-200 mg)) and the appropriate 2-hydroxyacetophenone (1 equiv) were dissolved in absolute EtOH in a round bottom flask. After stirring the mixture 10 to 15 min at r.t., NaOH (3 equiv) was added, and the solution was stirred overnight. The mixture was poured into  $\text{H}_2\text{O}$  and HCl 12 M, extracted with  $\text{CH}_2\text{Cl}_2$ , and washed with  $\text{H}_2\text{O}$ . The organic phase was dried over  $\text{MgSO}_4$ , filtered, and the solvent removed by evaporation. The product was purified by silica gel chromatography, using a mixture of petroleum ether/ $\text{CH}_2\text{Cl}_2$  4:1 as an eluent, and again using HPLC in MeCN/ $\text{H}_2\text{O}$  (90:10). After HPLC purification, the acetonitrile was removed under reduced pressure and the aqueous phase extracted with  $\text{CH}_2\text{Cl}_2$ . The NMR spectra of all purified compounds showed residual  $\text{CH}_2\text{Cl}_2$ , even after being dried under vacuum for several hours.

**(E)-1-(2'-hydroxyphenyl)-3-ferrocenylprop-2-en-1-one 1a.** Violet solid. Found: C 64.43, H 4.89. Calc. for  $\text{C}_{19}\text{H}_{16}\text{O}_2\text{Fe}\cdot 0.35 \text{CH}_2\text{Cl}_2$ : C 64.22, H 4.65.  $\delta_{\text{H}}$ (300 MHz;  $\text{CDCl}_3$ ;  $\text{Me}_4\text{Si}$ ) 7.90 (d,  $J=15.1$  Hz, 1H,  $\text{H}_{\text{vinyl}}$ ), 7.86 (d,  $J=7.7$  Hz, 1H,  $\text{H}_{\text{ar}}$ ), 7.48 (t,  $J=7.8$  Hz, 1H,  $\text{H}_{\text{ar}}$ ), 7.25 (d,  $J=15.1$  Hz, 1H,  $\text{H}_{\text{vinyl}}$ ), 7.02 (d,  $J=7.8$  Hz, 1H,  $\text{H}_{\text{ar}}$ ), 6.93 (t,  $J=7.7$  Hz, 1H,  $\text{H}_{\text{ar}}$ ), 4.64 (s, 2H,  $\text{C}_5\text{H}_4$ ), 4.55 (s, 2H,  $\text{C}_5\text{H}_4$ ), 4.20 (s, 5H,  $\text{C}_5\text{H}_5$ ).  $\delta_{\text{C}}$ (75 MHz;  $\text{CDCl}_3$ ;  $\text{Me}_4\text{Si}$ ) 192.7 ( $\text{C}_{\text{ketone}}$ ), 162.6 ( $\text{C}_{\text{ar}}$ ), 147.9 ( $\text{C}_{\text{vinyl}}$ ), 135.9 ( $\text{C}_{\text{ar}}$ ), 129.3 ( $\text{C}_{\text{ar}}$ ), 120.0 ( $\text{C}_{\text{vinyl}}$ ), 118.7 ( $\text{C}_{\text{ar}}$ ), 118.6 ( $\text{C}_{\text{ar}}$ ), 116.7 ( $\text{C}_{\text{ar}}$ ), 78.9 ( $\text{C}_5\text{H}_4$ ,  $\text{C}_{\text{quad}}$ ), 71.8 ( $\text{C}_5\text{H}_4$ ), 69.9 ( $\text{C}_5\text{H}_5$ ), 69.3 ( $\text{C}_5\text{H}_4$ ). MS (APCI)  $m/z$  332.07  $[\text{M}+\text{H}]^+$ . This compound has been previously reported.<sup>1</sup>

**(E)-1-(5'-chloro-2'-hydroxyphenyl)-3-ferrocenylprop-2-en-1-one 1b.** Violet solid. Found: C 61.75, H 4.02. Calc. for  $\text{C}_{19}\text{H}_{15}\text{O}_2\text{FeCl}\cdot 0.06 \text{CH}_2\text{Cl}_2$ : C 61.59, H 4.1.  $\delta_{\text{H}}$ (300 MHz;  $\text{CDCl}_3$ ;  $\text{Me}_4\text{Si}$ ) 7.94 (d,  $J=15$  Hz, 1H,  $\text{H}_{\text{vinyl}}$ ), 7.80 (d,  $J=2.4$  Hz, 1H,  $\text{H}_{\text{ar}}$ ), 7.42 (dd,  $^3J=9$  Hz,  $^4J=2.4$  Hz, 1H,  $\text{H}_{\text{ar}}$ ), 7.14 (d,  $J=15$  Hz, 1H,  $\text{H}_{\text{vinyl}}$ ), 6.96 (d,  $J=9$  Hz, 1H,  $\text{H}_{\text{ar}}$ ), 4.66 (s, 2H,  $\text{C}_5\text{H}_4$ ), 4.51 (s, 2H,  $\text{C}_5\text{H}_4$ ), 4.22 (s, 5H,  $\text{C}_5\text{H}_5$ ).  $\delta_{\text{C}}$ (75 MHz;  $\text{CDCl}_3$ ;  $\text{Me}_4\text{Si}$ ) 191.7 ( $\text{C}_{\text{ketone}}$ ), 162.1 ( $\text{C}_{\text{ar}}$ ), 149.4 ( $\text{C}_{\text{vinyl}}$ ), 135.6 ( $\text{C}_{\text{ar}}$ ), 128.5 ( $\text{C}_{\text{ar}}$ ), 123.3 ( $\text{C}_{\text{vinyl}}$ ), 120.7 ( $\text{C}_{\text{ar}}$ ), 120.2 ( $\text{C}_{\text{ar}}$ ), 115.9 ( $\text{C}_{\text{ar}}$ ), 78.6 ( $\text{C}_5\text{H}_4$ ,  $\text{C}_{\text{q}}$ ), 72.2 ( $\text{C}_5\text{H}_4$ ), 70.0 ( $\text{C}_5\text{H}_5$ ), 69.5 ( $\text{C}_5\text{H}_4$ ). MS (APCI)  $m/z$  366.03  $[\text{M}+\text{H}]^+$ .

**(E)-1-(5'-bromo-2'-hydroxyphenyl)-3-ferrocenylprop-2-en-1-one 1c.** Violet solid. Found: C 55.04, H 3.73. Calc. for  $C_{19}H_{15}O_2FeBr \cdot 0.05 CH_2Cl_2$ : C 55.09, H 3.66.  $\delta_H$ (300 MHz;  $CDCl_3$ ;  $Me_4Si$ ) 7.94 (d,  $J=14.4$  Hz, 1H,  $H_{vinyl}$ ), 7.92 (m, 1H,  $H_{ar}$ ), 7.55 (d,  $J=8.1$  Hz, 1H,  $H_{ar}$ ), 7.13 (d,  $J=14.5$  Hz, 1H,  $H_{vinyl}$ ), 6.92 (d,  $J=8.1$  Hz, 1H,  $H_{ar}$ ), 4.66 (s, 2H,  $C_5H_4$ ), 4.58 (s, 2H,  $C_5H_4$ ), 4.22 (s, 5H,  $C_5H_5$ ).  $\delta_C$ (75 MHz;  $CDCl_3$ ;  $Me_4Si$ ) 191.6 ( $C_{ketone}$ ), 162.5 ( $C_{ar}$ ), 149.4 ( $C_{vinyl}$ ), 138.4 ( $C_{ar}$ ), 131.6 ( $C_{ar}$ ), 121.3 ( $C_{vinyl}$ ), 120.6 ( $C_{ar}$ ), 115.9 ( $C_{ar}$ ), 110.3 ( $C_{ar}$ ), 78.6 ( $C_5H_4$ ,  $C_q$ ), 72.3 ( $C_5H_4$ ), 70.1 ( $C_5H_5$ ), 69.5 ( $C_5H_4$ ). MS (APCI)  $m/z$  410.05  $[M+H]^+$ .

**(E)-1-(3',5'-dichloro-2'-hydroxyphenyl)-3-ferrocenylprop-2-en-1-one 1d.** Violet solid. Found: C 55.72, H 3.49. Calc. for  $C_{19}H_{14}O_2FeCl_2 \cdot 0.125 CH_2Cl_2$ : C 55.80, H 3.49.  $\delta_H$ (300 MHz;  $CDCl_3$ ;  $Me_4Si$ ) 8.00 (d,  $J=15$  Hz, 1H,  $H_{vinyl}$ ), 7.74 (s, 1H,  $H_{ar}$ ), 7.57 (s, 1H,  $H_{ar}$ ), 7.01 (d,  $J=15$  Hz, 1H,  $H_{vinyl}$ ), 4.67 (s, 2H,  $C_5H_4$ ), 4.62 (s, 2H,  $C_5H_4$ ), 4.23 (s, 5H,  $C_5H_5$ ).  $\delta_C$ (75 MHz;  $CDCl_3$ ;  $Me_4Si$ ) 190.2 ( $C_{ketone}$ ), 157.0 ( $C_{ar}$ ), 149.8 ( $C_{vinyl}$ ), 134.1 ( $C_{ar}$ ), 126.1 ( $C_{ar}$ ), 122.9 ( $C_{ar}$ ), 122.0 ( $C_{ar}$ ), 120.2 ( $C_{ar}$ ), 114.2 ( $C_{vinyl}$ ), 77.3 ( $C_5H_4$ ,  $C_q$ ), 71.6 ( $C_5H_4$ ), 69.1 ( $C_5H_5$ ), 68.7 ( $C_5H_4$ ). MS (APCI)  $m/z$  400.08  $[M+H]^+$ .

**(E)-1-(3',5'-dibromo-2'-hydroxyphenyl)-3-ferrocenylprop-2-en-1-one 1e.** Violet solid. Found: C 45.24, H 2.70. Calc. for  $C_{19}H_{14}O_2FeBr_2 \cdot 0.25 CH_2Cl_2$ : C 45.23, H 2.86.  $\delta_H$ (300 MHz;  $CDCl_3$ ;  $Me_4Si$ ) 7.99 (d,  $J=14.7$  Hz, 1H,  $H_{vinyl}$ ), 7.91 (d,  $^4J=1.8$  Hz, 1H,  $H_{ar}$ ), 7.86 (d,  $^4J=1.8$  Hz, 1H,  $H_{ar}$ ), 7.10 (d,  $J=14.7$  Hz, 1H,  $H_{vinyl}$ ), 4.67 (s, 2H,  $C_5H_4$ ), 4.62 (s, 2H,  $C_5H_4$ ), 4.23 (s, 5H,  $C_5H_5$ ).  $\delta_C$ (75 MHz;  $CDCl_3$ ;  $Me_4Si$ ) 191.0 ( $C_{ketone}$ ), 159.3 ( $C_{ar}$ ), 150.8 ( $C_{vinyl}$ ), 140.7 ( $C_{ar}$ ), 130.8 ( $C_{ar}$ ), 121.7 ( $C_{ar}$ ), 115.1 ( $C_{vinyl}$ ), 113.3 ( $C_{ar}$ ), 110.1 ( $C_{ar}$ ), 78.37 ( $C_5H_4$ ,  $C_q$ ), 72.6 ( $C_5H_4$ ), 70.1 ( $C_5H_5$ ), 69.7 ( $C_5H_4$ ). MS (APCI)  $m/z$  488.01  $[M+H]^+$ .

**((E)-1-(3',5'-difluoro-2'-hydroxyphenyl)-3-ferrocenylprop-2-en-1-one 1f.** Violet solid. Found: C 60.25, H 4.04. Calc. for  $C_{19}H_{14}O_2FeF_2 \cdot 0.2 CH_2Cl_2$ : C 59.88, H 3.77.  $\delta_H$ (400 MHz;  $CDCl_3$ ;  $Me_4Si$ ) 7.98 (d,  $J=15$  Hz, 1H,  $H_{vinyl}$ ), 7.34 (s, 1H,  $H_{ar}$ ), 7.06 (m, 1H,  $H_{vinyl}$ ,  $H_{ar}$ ), 4.66 (s, 2H,  $C_5H_4$ ), 4.61 (s, 2H,  $C_5H_4$ ), 4.22 (s, 5H,  $C_5H_5$ ).  $\delta_C$ (100 MHz;  $CDCl_3$ ;  $Me_4Si$ ) 191.6 ( $C_{ketone}$ ), 153.3 (dd,  $^1J=238.6$  Hz,  $^3J=9$  Hz,  $C_{ar}$ ), ~151 ( $C_{ar}$  overlap) 150.5 ( $C_{vinyl}$ ), 148.8 (d,  $^2J=11.9$  Hz,  $C_{ar}$ ) 120.9 ( $C_{ar}$ ), 115.7 ( $C_{vinyl}$ ), 110.5 (dd,  $^2J=26$  Hz,  $^2J=21$  Hz,  $C_{ar}$ ), 109.6 (d,  $^2J=23$  Hz,  $C_{ar}$ ), 78.4 ( $C_5H_4$ ,  $C_q$ ), 72.6 ( $C_5H_4$ ), 70.2 ( $C_5H_5$ ), 69.7 ( $C_5H_4$ ). MS (APCI)  $m/z$  368.07  $[M+H]^+$ .

#### General preparation of ferrocenyl flavones

Ferrocene chalcone (10 mg) was dissolved in THF (15 mL) in a 50 mL two-necked round bottom flask. NaH (3 equiv) was added and the solution went from deep violet to a light red. After stirring for 5 min at room temperature, AgOTf (2.5 equiv) was added, and the mixture was stirred for another 5 min, before being poured into a  $H_2O$  (100 mL) and HCl 12 M (15 mL). The mixture was extracted with  $CH_2Cl_2$  (3x50 mL), and washed with water. The organic phase was dried over  $MgSO_4$ , filtered and evaporated. The product was purified using a silica gel column, using a mixture of petroleum ether/dichloromethane 1/1, and again by HPLC using  $CH_3CN/H_2O$ , and the  $^1H$  NMR spectra showed the presence of residual  $H_2O$ . Yields were calculated after purification on the silica gel column.

**2-ferrocenyl-chromen-4-one 2a.** Yield: 8.0 mg, 80%. Violet solid. Found: C 67.60, H 4.66. Calc. for  $C_{19}H_{14}O_2Fe \cdot 0.5 H_2O$ : C 67.28, H 4.46.  $\delta_H$ (300 MHz;  $CDCl_3$ ;  $Me_4Si$ ) 7.80 (d,  $J=7.5$  Hz, 1H,  $H_{ar}$ ), 7.64 (t,  $J=7.2$  Hz, 1H,  $H_{ar}$ ), 7.29 (d,  $J=7.2$  Hz, 1H,  $H_{ar}$ ), 7.19 (t,  $J=7.5$  Hz, 1H,  $H_{ar}$ ), 6.89 (s, 1H,  $H_{vinyl}$ ), 4.92 (s, 2H,  $C_5H_4$ ), 4.60 (s, 2H,  $C_5H_4$ ), 4.22 (s, 5H,  $C_5H_5$ ).  $\delta_C$ (75 MHz;  $CDCl_3$ ;  $Me_4Si$ ) 182.9 ( $C_{ketone}$ ), 165.4

(C<sub>ar</sub>), 146.0 (C<sub>vinyl</sub>), 136.1 (C<sub>ar</sub>), 124.5 (C<sub>ar</sub>), 123.1 (C<sub>vinyl</sub>), 122.6 (C<sub>ar</sub>), 116.4 (C<sub>ar</sub>), 112.9 (C<sub>ar</sub>), 75.1 (C<sub>5</sub>H<sub>4</sub>, C<sub>q</sub>), 71.8 (C<sub>5</sub>H<sub>4</sub>), 71.5 (C<sub>5</sub>H<sub>4</sub>), 70.0 (C<sub>5</sub>H<sub>5</sub>). MS (APCI) *m/z* 331.07 [M+H]<sup>+</sup>.

**6-chloro-2-ferrocenyl-chromen-4-one 2b.** Yield: 7.8 mg, 78%. Violet solid. Found: C 61.65, H 3.67. Calc. for C<sub>19</sub>H<sub>13</sub>O<sub>2</sub>FeCl·0.25 H<sub>2</sub>O: C 61.66, H 3.69. δ<sub>H</sub>(300 MHz; CDCl<sub>3</sub>; Me<sub>4</sub>Si) 7.77 (d, *J*=2.1 Hz, 1H, H<sub>ar</sub>), 7.57 (dd, <sup>4</sup>*J*=2.1 Hz, <sup>3</sup>*J*=8.7 Hz, 1H, H<sub>ar</sub>), 7.24 (m, 1H, H<sub>ar</sub>), 6.92 (s, 1H, H<sub>vinyl</sub>), 4.91 (s, 2H, C<sub>5</sub>H<sub>4</sub>), 4.63 (s, 2H, C<sub>5</sub>H<sub>4</sub>), 4.24 (s, 5H, C<sub>5</sub>H<sub>5</sub>). δ<sub>C</sub>(75 MHz; CDCl<sub>3</sub>; Me<sub>4</sub>Si) 181.4 (C<sub>ketone</sub>), 163.5 (C<sub>ar</sub>), 146.1 (C<sub>vinyl</sub>), 135.8 (C<sub>ar</sub>), 128.8 (C<sub>ar</sub>), 124.0 (C<sub>vinyl</sub>), 123.8 (C<sub>ar</sub>), 117.9 (C<sub>ar</sub>), 114.2 (C<sub>ar</sub>), 74.7 (C<sub>5</sub>H<sub>4</sub>, C<sub>q</sub>), 72.2 (C<sub>5</sub>H<sub>4</sub>), 71.6 (C<sub>5</sub>H<sub>4</sub>), 70.0 (C<sub>5</sub>H<sub>5</sub>). MS (APCI) *m/z* 364.02 [M+H]<sup>+</sup>.

**6-bromo-2-ferrocenyl-chromen-4-one 2c.** Yield: 6.4 mg, 64%. Violet solid. Found: C 55.77, H 3.65. Calc. for C<sub>19</sub>H<sub>13</sub>O<sub>2</sub>FeBr·0.165 H<sub>2</sub>O: C 55.39, H 3.26. δ<sub>H</sub>(300 MHz; CDCl<sub>3</sub>; Me<sub>4</sub>Si) 7.93 (d, *J*=2.1 Hz, 1H, H<sub>ar</sub>), 7.72 (dd, <sup>4</sup>*J*=2.1 Hz, <sup>3</sup>*J*=8.7 Hz, 1H, H<sub>ar</sub>), 7.20 (d, *J*=8.7 Hz, 1H, H<sub>ar</sub>), 6.94 (s, 1H, H<sub>vinyl</sub>), 4.86 (m, 2H, C<sub>5</sub>H<sub>4</sub>), 4.60 (m, 2H, C<sub>5</sub>H<sub>4</sub>), 4.19 (s, 5H, C<sub>5</sub>H<sub>5</sub>). δ<sub>C</sub>(75 MHz; CDCl<sub>3</sub>; Me<sub>4</sub>Si) 181.2 (C<sub>ketone</sub>), 163.9 (C<sub>ar</sub>), 145.9 (C<sub>vinyl</sub>), 138.5 (C<sub>ar</sub>), 127.1 (C<sub>ar</sub>), 124.4 (C<sub>vinyl</sub>), 118.0 (C<sub>ar</sub>), 115.9 (C<sub>ar</sub>), 114.7 (C<sub>ar</sub>), 74.7 (C<sub>5</sub>H<sub>4</sub>, C<sub>q</sub>), 72.2 (C<sub>5</sub>H<sub>4</sub>), 71.7 (C<sub>5</sub>H<sub>4</sub>), 70.1 (C<sub>5</sub>H<sub>5</sub>). MS (APCI) *m/z* 408.08 [M+H]<sup>+</sup>.

**6,8-dichloro-2-ferrocenyl-chromen-4-one 2d.** Yield: 6.2 mg, 62%. Blue solid. Found: C 56.05, H 3.31. Calc. for C<sub>19</sub>H<sub>12</sub>O<sub>2</sub>FeCl<sub>2</sub>·0.5 H<sub>2</sub>O: C 55.93, H 3.21. δ<sub>H</sub>(300 MHz; CDCl<sub>3</sub>; Me<sub>4</sub>Si) 7.69 (d, *J*=2.1 Hz, 1H, H<sub>ar</sub>), 7.64 (d, *J*=2.1 Hz, 1H, H<sub>ar</sub>), 7.06 (s, 1H, H<sub>vinyl</sub>), 4.93 (s, 2H, C<sub>5</sub>H<sub>4</sub>), 4.66 (s, 2H, C<sub>5</sub>H<sub>4</sub>), 4.22 (s, 5H, C<sub>5</sub>H<sub>5</sub>). δ<sub>C</sub>(75 MHz; CDCl<sub>3</sub>; Me<sub>4</sub>Si) 179.3 (C<sub>ketone</sub>), 158.2 (C<sub>ar</sub>), 144.8 (C<sub>vinyl</sub>), 134.0 (C<sub>ar</sub>), 127.9 (C<sub>ar</sub>), 124.1 (C<sub>ar</sub>), 121.4 (C<sub>vinyl</sub>), 118.9 (C<sub>ar</sub>), 118.4 (C<sub>ar</sub>), 73.3 (C<sub>5</sub>H<sub>4</sub>, C<sub>q</sub>), 71.7 (C<sub>5</sub>H<sub>4</sub>), 71.0 (C<sub>5</sub>H<sub>4</sub>), 69.2 (C<sub>5</sub>H<sub>5</sub>). MS (APCI) *m/z* 398.00 [M+H]<sup>+</sup>.

**6,8-dibromo-2-ferrocenyl-chromen-4-one 2e.** Yield: 8.0 mg, 80%. Blue solid. Found: C 46.47, H 2.60. Calc. for C<sub>19</sub>H<sub>12</sub>O<sub>2</sub>FeBr<sub>2</sub>·0.25 H<sub>2</sub>O: C 46.34, H 2.56. δ<sub>H</sub>(300 MHz; CDCl<sub>3</sub>; Me<sub>4</sub>Si) 7.92 (d, *J*=1.5 Hz, 1H, H<sub>ar</sub>), 7.86 (d, *J*=1.5 Hz, 1H, H<sub>ar</sub>), 7.03 (s, 1H, H<sub>vinyl</sub>), 4.93 (s, 2H, C<sub>5</sub>H<sub>4</sub>), 4.67 (s, 2H, C<sub>5</sub>H<sub>4</sub>), 4.22 (s, 5H, C<sub>5</sub>H<sub>5</sub>). δ<sub>C</sub>(75 MHz; CDCl<sub>3</sub>; Me<sub>4</sub>Si) 179.3 (C<sub>ketone</sub>), 159.9 (C<sub>ar</sub>), 144.4 (C<sub>vinyl</sub>), 139.2 (C<sub>ar</sub>), 129.8 (C<sub>ar</sub>), 125.0 (C<sub>vinyl</sub>), 124.5 (C<sub>ar</sub>), 119.0 (C<sub>ar</sub>), 115.0 (C<sub>ar</sub>), 73.3 (C<sub>5</sub>H<sub>4</sub>, C<sub>q</sub>), 71.7 (C<sub>5</sub>H<sub>4</sub>), 71.0 (C<sub>5</sub>H<sub>4</sub>), 69.2 (C<sub>5</sub>H<sub>5</sub>). MS (APCI) *m/z* 485.99 [M+H]<sup>+</sup>.

**6,8-difluoro-2-ferrocenyl-chromen-4-one 2f.** Yield: 8.6 mg, 86%. Violet-blue solid. Found: C 61.04, H 3.22. Calc. for C<sub>19</sub>H<sub>12</sub>O<sub>2</sub>FeF<sub>2</sub>·0.5 H<sub>2</sub>O: C 60.83, H 3.49. δ<sub>H</sub>(400 MHz; CDCl<sub>3</sub>; Me<sub>4</sub>Si) 7.31-7.29 (m, 1H, H<sub>ar</sub>), 7.22-7.15 (m, 1H, H<sub>ar</sub>), 7.02 (s, 1H, H<sub>vinyl</sub>), 4.91 (s, 2H, C<sub>5</sub>H<sub>4</sub>), 4.65 (s, 2H, C<sub>5</sub>H<sub>4</sub>), 4.22 (s, 5H, C<sub>5</sub>H<sub>5</sub>). δ<sub>C</sub>(100 MHz; CDCl<sub>3</sub>; Me<sub>4</sub>Si) 180.7 (C<sub>ketone</sub>), 157.9 (dd, <sup>1</sup>*J*=246.5 Hz, <sup>3</sup>*J*=7.3 Hz, C<sub>ar</sub>), 148.8 (d, <sup>2</sup>*J*=11.3 Hz, C<sub>ar</sub>), 148.1 (dd, <sup>1</sup>*J*=254.7 Hz, <sup>3</sup>*J*=11.2 Hz, C<sub>ar</sub>), 145.9 (C<sub>vinyl</sub>), 125.6 (d, <sup>3</sup>*J*=7.7 Hz, C<sub>ar</sub>), 119.8 (C<sub>vinyl</sub>), 110.9 (dd, <sup>2</sup>*J*=19.7 Hz, <sup>2</sup>*J*=24.3 Hz, C<sub>ar</sub>), 105.5 (dd, <sup>2</sup>*J*=23.8 Hz, <sup>4</sup>*J*=4.1 Hz, C<sub>ar</sub>), 74.3 (C<sub>5</sub>H<sub>4</sub>, C<sub>q</sub>), 72.6 (C<sub>5</sub>H<sub>4</sub>), 71.9 (C<sub>5</sub>H<sub>4</sub>), 70.2 (C<sub>5</sub>H<sub>5</sub>). MS (APCI) *m/z* 366.04 [M+H]<sup>+</sup>.

#### Theoretical calculations

A coarse drawing of the structure led to a geometry that was first improved using Hartree-Fock ab-initio calculations at a STO3G level; the resulting structure was then optimized using a 321G basis (a more sophisticated, but time and memory consuming, 631G basis only led to minor improvements over 321G). No symmetry constraint was imposed during optimization, allowing the full (3N - 6) degrees of freedom. The energy minimum was obtained by minimizing the gradient norm using the default (BFGS) algorithm; for the neutral **1a** and derived anionic species we used the RHF method and the ROHF for the treatment of the radical species.

This suite of programs in GAMESS<sup>2</sup> was run on RS/6000 System Regatta Power4 machines.

Biological evaluation.

Murine B16 melanoma cells were grown in Dulbecco's modified essential medium (DMEM) containing 2 mM L-glutamine, 10% fetal bovine serum, 100 U/mL penicillin and 100 µg/mL streptomycin (37°C, 5% CO<sub>2</sub>). Stock solutions of the compounds were prepared in DMSO and further diluted in DMEM at the indicated concentrations with a final DMSO concentration of not exceeding 1%. Exponentially growing cells were plated onto 96-well plates at a density of 5000 cells per well in 200 µL DMEM, and 24 h later the compounds were added for another 48 h. Control cells were exposed to 1% DMSO. Viability was assessed using the MTT (1-(4,5-dimethylthiazol-2-yl)-3,5-diphenyltetrazolium) test and absorbance was read at 562 nm in a microplate reader (BioKinetics Reader, EL340).<sup>3</sup> Results are presented as the inhibitory concentrations for 50% of cells (IC<sub>50</sub>) for a 48 h exposure time (mean ± S.D. of three determinations).

- 1 X. Wu, P. Wilairat, M. L. Go, *Bioorg. Med. Chem. Lett.* 2002, **12**, 2299.
- 2 M. W. Schmidt, K. K. Baldrige, J. A. Boatz, S. T. Elbert, M. S. Gordon, J. J. Jensen, S. Koseki, N. Matsunaya, K. A. Nguyen, S. Su, T. L. Windus, M. Dupuis, J. A. Montgomery, *J. Comput. Chem.* 1993, **14**, 1347.
- 3 J. Carmichael, W. G. DeGraff, A. F. Gazdar, J. D. Minna, J. B. Mitchell, *Cancer Res.* 1987, **47**, 936.
